# Supplementary material for: Rapid Identification of Chemoresistance Mechanisms Using Yeast DNA Mismatch Repair Mutants
Source: PubMed Central journal article supplement (PMC4555229; doi:10.1534/g3.115.020560), 2015-07-21
Supplement: supp_g3.115.020560_TableS1.pdf [file supp_g3.115.020560_TableS1.pdf]

**Table S1 Compounds with high resistance rates after prolonged growth**

| <b>Compounds</b> | <b><i>msh2</i>Δ Lag Phase<br/>(hours)</b> | <b>Notes</b>               |
|------------------|-------------------------------------------|----------------------------|
| NSC 1011         | 41                                        | 1st NIH Screen             |
| Celastrol        | 24                                        | 1st NIH Screen             |
| Actinomycin D    | 36                                        | 2 <sup>nd</sup> NIH Screen |
| Camptothecin     | 39                                        | 2 <sup>nd</sup> NIH Screen |
| Daunorubicin     | 29                                        | 2 <sup>nd</sup> NIH Screen |
| Mitoxantrone     | >24                                       | 3 <sup>rd</sup> Screen     |
| Exemestane       | >24                                       | 3 <sup>rd</sup> Screen     |
| Mechlorethamine  | >24                                       | 3 <sup>rd</sup> Screen     |
| Hexestrol        | >24                                       | 3 <sup>rd</sup> Screen     |
| Doxorubicin      | >24                                       | 3 <sup>rd</sup> Screen     |
| Cinnarizine      | >24                                       | 3 <sup>rd</sup> Screen     |
| Doxycycline      | >24                                       | 3 <sup>rd</sup> Screen     |
| Aphidicolin      | >24                                       | 3 <sup>rd</sup> Screen     |
| YC-1             | >24                                       | 3 <sup>rd</sup> Screen     |
| Myriocin         | >24                                       | 3 <sup>rd</sup> Screen     |
| Cerulenin        | >24                                       | 3 <sup>rd</sup> Screen     |
| Perillic Acid    | >24                                       | 3 <sup>rd</sup> Screen     |
| Brefeldin A      | >24                                       | 3 <sup>rd</sup> Screen     |
| MST-312          | >24                                       | 3 <sup>rd</sup> Screen     |
