# Supplementary material for: Rapid Identification of Chemoresistance Mechanisms Using Yeast DNA Mismatch Repair Mutants
Source: PubMed Central journal article supplement (PMC4555229; doi:10.1534/g3.115.020560), 2015-07-21
Supplement: supp_g3.115.020560_TableS2.pdf [file supp_g3.115.020560_TableS2.pdf]

**Table S2 Compounds with a mismatch repair specific resistance phenotype**

| <b>Compounds</b> | <b><i>msh2</i>Δ Lag Phase<br/>(hours)</b> | <b>Screen</b>              |
|------------------|-------------------------------------------|----------------------------|
| Thiallipticine   | 17                                        | 1st NIH Screen             |
| NSC 116339       | 18                                        | 1st NIH Screen             |
| Confertifoline   | 13                                        | 2 <sup>nd</sup> NIH Screen |
| Etoposide        | <24                                       | 3 <sup>rd</sup> Screen     |
| Dacarbazine      | <24                                       | 3 <sup>rd</sup> Screen     |
| Fluorouracil     | <24                                       | 3 <sup>rd</sup> Screen     |
| Piperine         | <24                                       | 3 <sup>rd</sup> Screen     |
| Formestane       | <24                                       | 3 <sup>rd</sup> Screen     |
| Estramustine     | <24                                       | 3 <sup>rd</sup> Screen     |
